# Supplementary material for: VIRMA modulates function of photoreceptor cells through m6A modification and alternative splicing
Source: JCI journal article supplement (doi:10.1172/jci.insight.197880), 2026-03-19
Supplement: sd3 [file 3]

**VIRMA modulates function of photoreceptor cells through m<sup>6</sup>A modification and alternative splicing**

Wenjing Liu<sup>1,2#</sup>, Xiaojing Wu<sup>1#</sup>, Rong Zou<sup>2#</sup>, Fan Zhang<sup>3#</sup>, Yudi Fan<sup>2</sup>, Kuanxiang Sun<sup>2</sup>, Liping Yang<sup>4\*</sup>, Jiang Hu<sup>1\*</sup>, Lin Zhang<sup>2,5\*</sup>, Xianjun Zhu<sup>1,2,5\*</sup>

Supplementary data include Supplemental Figure 1-9 and Supplementary Table 2-4.

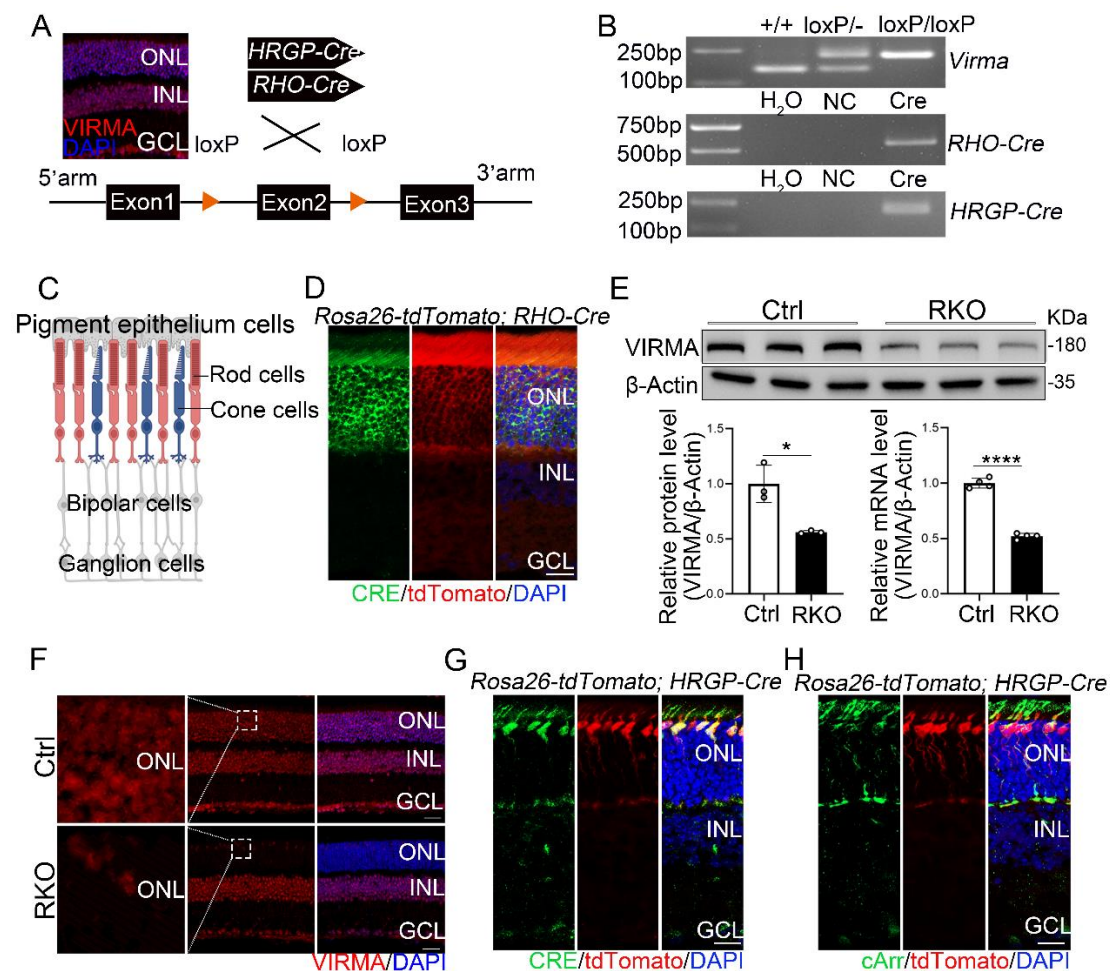

**Supplemental Figure 1. Generation of the photoreceptor specific *Virma* knockout mice.** (A) Representative images of VIRMA (red) expression in the retina and schematic drawings of the genetic deletion strategy for *Virma* in rods and cones using

*RHO-Cre* and *HRGP-Cre*, respectively. Scale bars, 25  $\mu\text{m}$ . (B) Genotyping of RKO and HKO mice. (C) Schematic diagram of mice retina. (D) Immunofluorescence staining of retinal section from *Rosa26-tdTomato*; *RHO-Cre* mice with anti-Cre antibody (green). Scale bar, 50  $\mu\text{m}$ . (E) Western blot and RT-qPCR comparison of VIRMA expression in retinas of Ctrl and RKO mice (Student's *t* test,  $n=3$ ). (F) Immunofluorescence staining of retinal sections with VIRMA antibody (red) from Ctrl and RKO mice at 3 weeks of age. Scale bars, 25  $\mu\text{m}$ . (G) Immunofluorescence staining of retinal section from *Rosa26-tdTomato*; *HRGP-Cre* mice with anti-Cre antibody (green). Scale bar, 50  $\mu\text{m}$ . (H) The retina section was labeled with cArr antibody (green) to mark cone photoreceptor cells. Scale bar, 50  $\mu\text{m}$ . ONL, outer nuclear layer; INL, inner nuclear layer; GCL, ganglion cell layer. Data are presented as the mean  $\pm$  SD. \* $p < 0.05$ ; \*\*\*\* $p < 0.0001$ ; #, no significant difference.

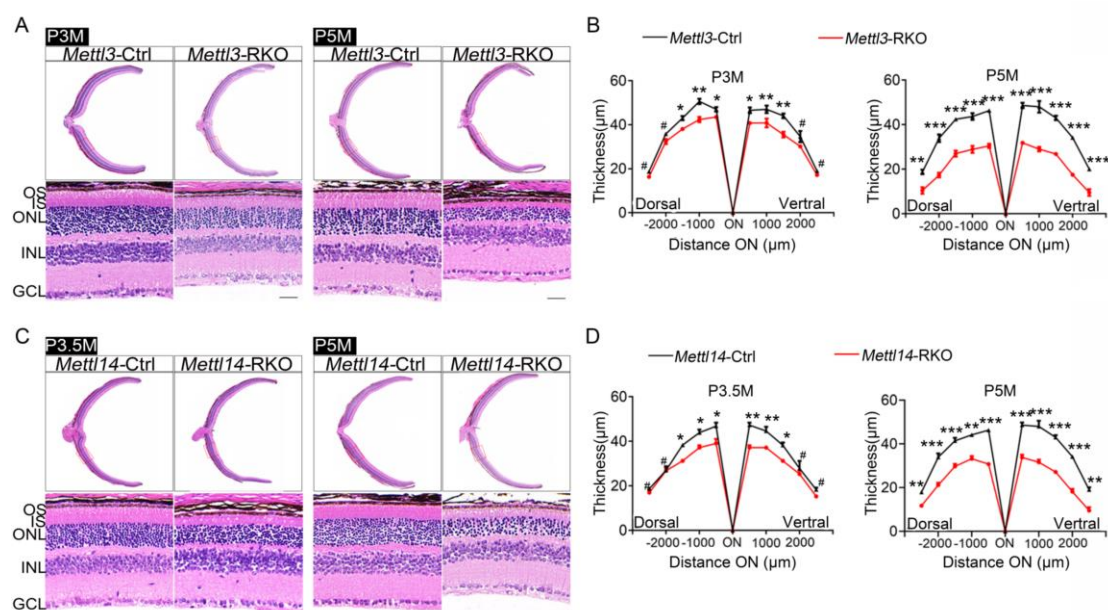

**Supplemental Figure 2. Photoreceptor degeneration in *Mettl3/14* rods-specific**

**knockout mice.** (A) H&E staining of paraffin sections of *Mettl3*-Ctrl and *Mettl3*-RKO retinas at the ages of 3 months and 5 months, respectively. Scale bars, 50  $\mu$ m. (B) Quantitative analysis of the ONL thickness in the *Mettl3*-Ctrl and *Mettl3*-RKO retinas at defined ages (n = 3). (C) H&E staining of paraffin sections of *Mettl14*-Ctrl and *Mettl14*-RKO retinas at the ages of 3.5 months and 5 months, respectively. Scale bars, 50  $\mu$ m. (D) Quantitative analysis of the ONL thickness in the *Mettl14*-Ctrl and *Mettl14*-RKO retinas at defined ages (n = 3). OS, outer segment; IS, inner segment; ONL, outer nuclear layer; INL, inner nuclear layer; GCL, ganglion cell layer. Data are presented as the mean  $\pm$  SD. ONL thickness was analyzed by multiple 2-tailed *t* tests with the Holm-Sidak method to correct for multiple comparisons. \**p* < 0.05; \*\**p* < 0.01; \*\*\**p* < 0.001; \*\*\*\**p* < 0.0001; #, no significant difference.

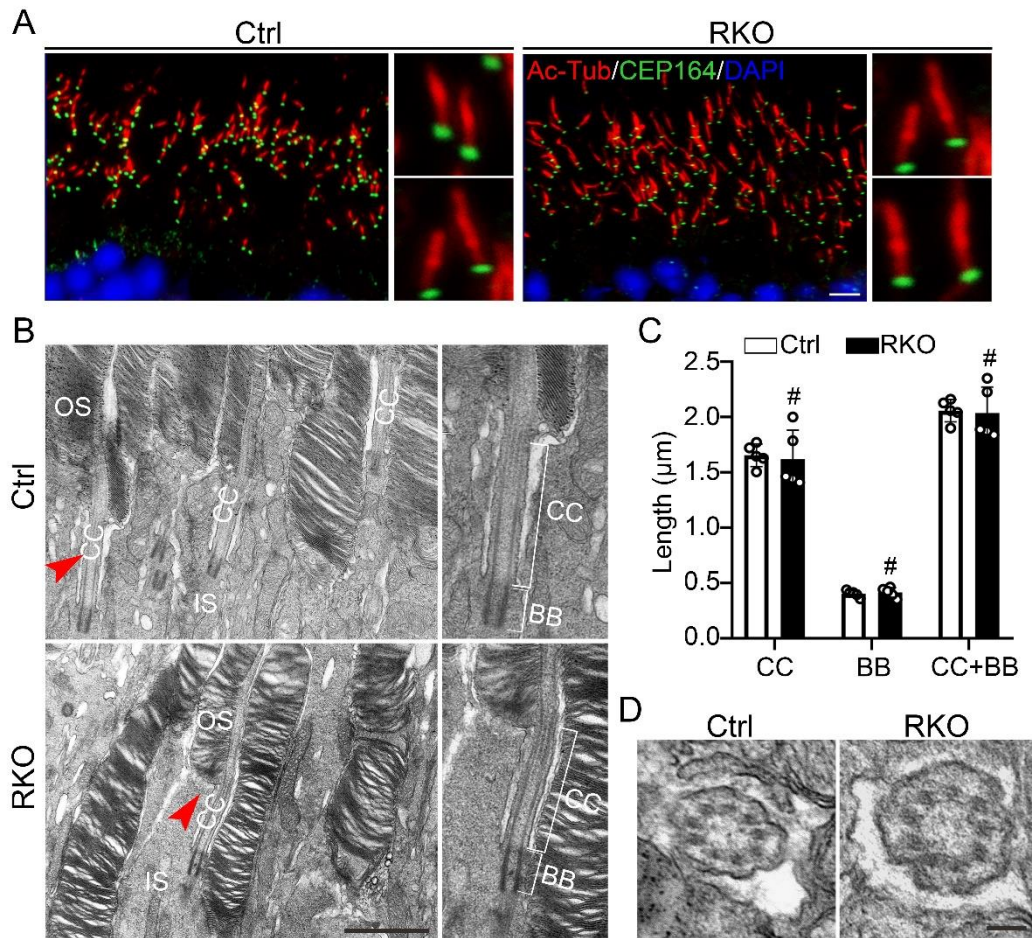

**Supplemental Figure 3. No visible defect was observed in cilia structure of RKO mice.** (A) Representative immunofluorescence images with a ciliary marker acetylated  $\alpha$ -tubulin (red) and the centriole marker CEP164 (green) in retinas from 4-week-old Ctrl and RKO mice. Scale bars, 2  $\mu$ m and 1  $\mu$ m (higher-magnification images). (B) Representative electron micrographs of the ciliary region of photoreceptor cells from 4-week-old Ctrl and RKO mice. Scale bars, 2  $\mu$ m and 1  $\mu$ m (higher-magnification images). (C) Quantitative analyses of the length of the BB and CC in Ctrl and RKO photoreceptors (Student's *t* test, *n*=5). OS, outer segment; IS, inner segment; CC, connecting cilium; BB, basal body. (D) Representative electron micrographs of the transverse section of cilia. Scale bars, 200 nm. Data are presented as the mean  $\pm$  SD. #,

no significant difference.

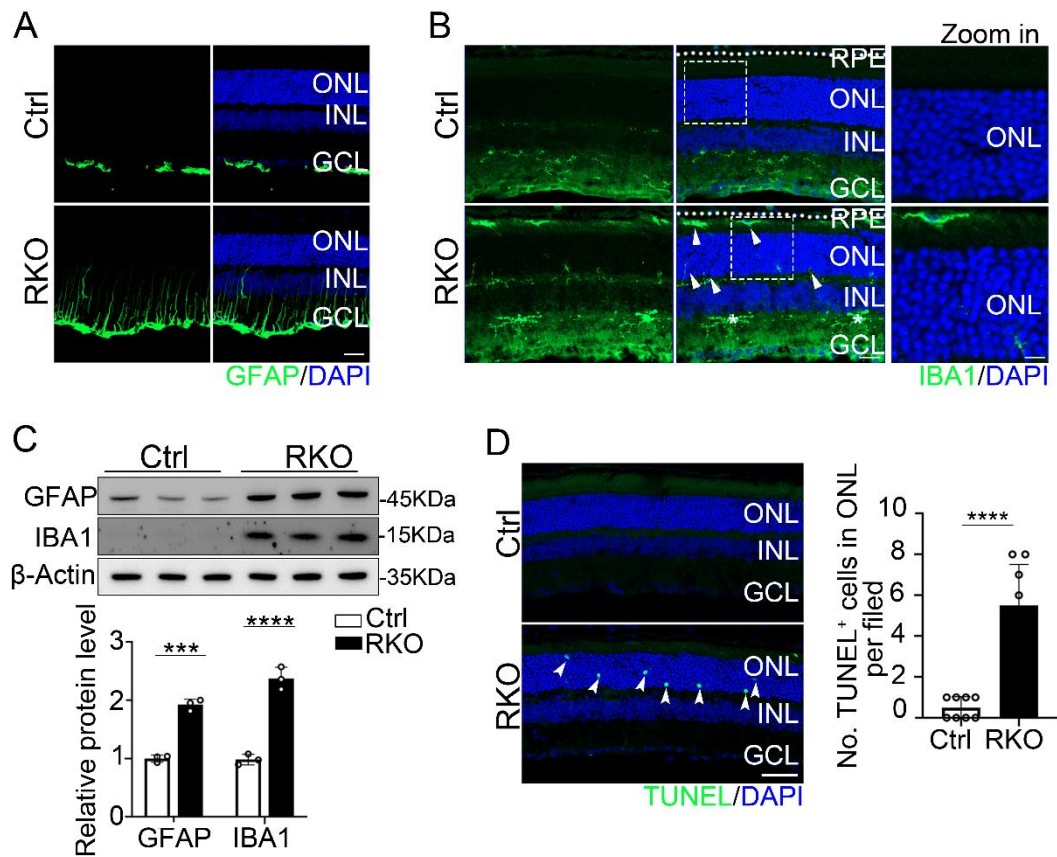

**Supplemental Figure 4. Activation of resident retinal glial and immune cells in RKO mice.** (A) Retina cryosections from 4-week-old mice were stained with GFAP (green). Scale bars, 20  $\mu$ m. (B) Retina cryosections from 4-week-old mice were labeled with IBA1 (green). White arrowheads indicate IBA1-positive cells located inside or at the RPE (basal) side of the RKO retina. White dashed lines indicate RPE. Scale bars, 20  $\mu$ m and 5 $\mu$ m (higher-magnification images). (C) Western blot and quantitative analysis of retina lysates from 4-week-old Ctrl and RKO mice (Student's *t* test, n=3). (D) Immunofluorescence labelling of retina cryosections from 4-week-old mice with the TUNEL assay kit and quantification of the number of TUNEL-positive cell (green) in ONL per field (Student's *t* test, n=8). White arrowheads represent TUNEL-positive

cells. Scale bars, 20  $\mu\text{m}$ . Data are presented as the mean  $\pm$  SD. \*\*\* $p < 0.001$ ; \*\*\*\* $p < 0.0001$ .

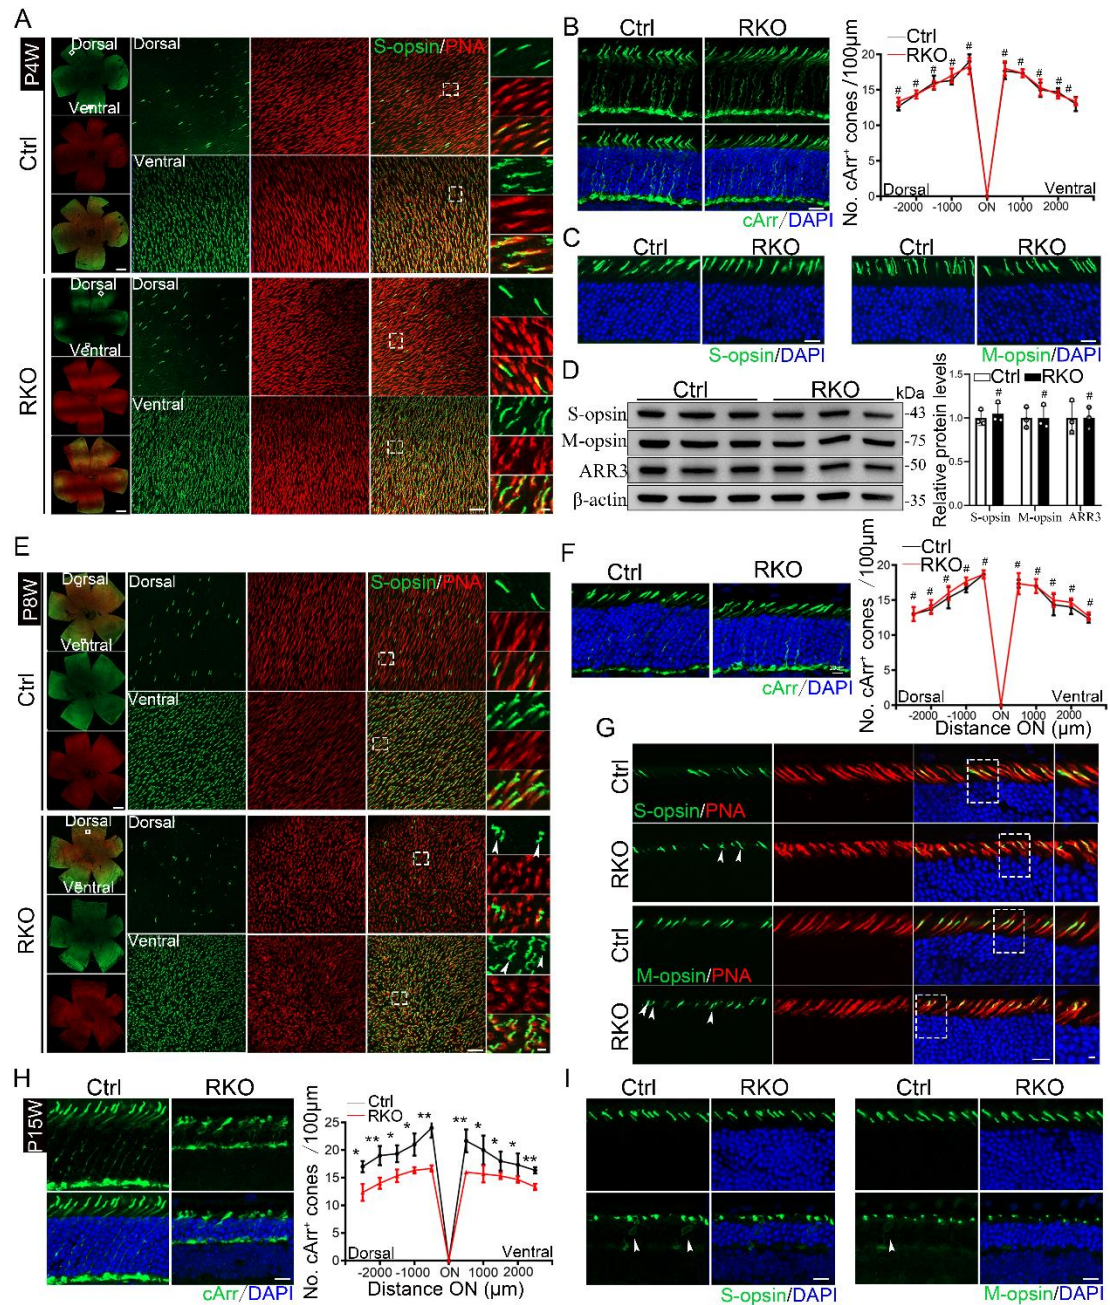

**Supplemental Figure 5. Cone degeneration followed rods loss in RKO mice. (A)** Immunostaining of retina flat-mount from 4-week-old Ctrl and RKO mice with S-opsin (green) and PNA (red). Scale bars, 50  $\mu\text{m}$ . Representative images from the dorsal and

ventral retinal quadrant are shown. Scale bars, 20  $\mu\text{m}$ . Inset images showed a cropped and zoomed image. Scale bars, 5  $\mu\text{m}$ . **(B)** Representative immunofluorescence images of cArr (green) of retina sections from 4-week-old Ctrl and RKO mice and the number of cArr-positive cones per 500  $\mu\text{m}$  field was quantified. Scale bars, 25  $\mu\text{m}$ . **(C)** Retinal cryosections from 4-week-old Ctrl and RKO mice were labeled with S-opsin and M-opsin. Scale bars, 20  $\mu\text{m}$ . **(D)** Western blot and quantification analysis of cone related proteins in 4-week-old Ctrl and RKO mice (Student's *t* test,  $n=3$ ). **(E)** Immunostaining of retina flat-mount from 8-week-old Ctrl and RKO mice with S-opsin (green) and PNA (red), and representative images were presented. White arrowheads indicate the misshaped cones. Scale bars, 50  $\mu\text{m}$  (retina flat-mount), 20  $\mu\text{m}$  (dorsal and ventral retinal quadrant image), and 5  $\mu\text{m}$  (zoomed image). **(F)** Representative immunofluorescence images and statistical analysis of cone numbers from 8-week-old Ctrl and RKO mice. Scale bars, 25  $\mu\text{m}$ . **(G)** Retinal cryosections from 8-week-old Ctrl and RKO mice were labeled with S/M-opsin and PNA. White arrowheads indicate the misshaped cones. Scale bars, 20  $\mu\text{m}$  and 1  $\mu\text{m}$  (zoomed images). **(H)** Representative immunofluorescence images and statistical analysis of cone numbers from 15-week-old Ctrl and RKO mice. Scale bars, 25  $\mu\text{m}$ . **(I)** Retinal cryosections from 15-week-old Ctrl and RKO mice were labeled with S-opsin and M-opsin. White arrowheads indicate mislocalized S/M-opsin. Scale bars, 20  $\mu\text{m}$ . Data are presented as the mean  $\pm$  SD. The number of cArr-positive cone cells was analyzed by multiple 2-tailed *t* tests with the Holm-Sidak method to correct for multiple comparisons. \* $p < 0.05$ ; \*\* $p < 0.01$ ; #, no significant difference.

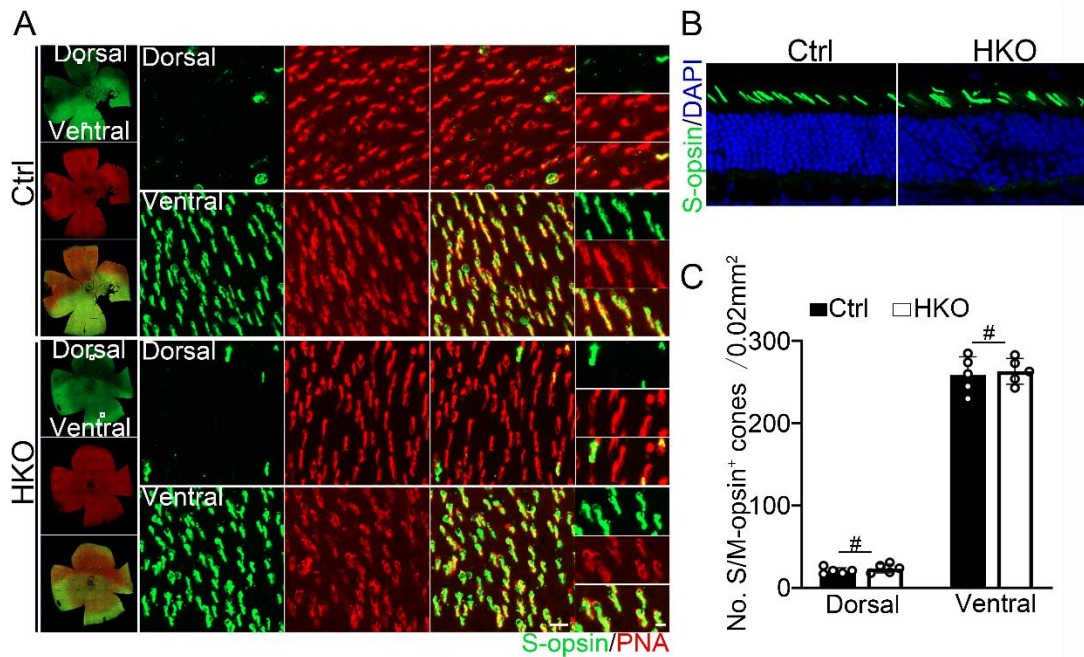

**Supplemental Figure 6. Distortion of S-opsin-positive cones in HKO mice. (A)**

Immunostaining of retina flat-mount from 8-week-old Ctrl and HKO mice with S-opsin (green) and PNA (red). Scale bars, 50  $\mu\text{m}$ . Representative images from the dorsal and ventral retinal quadrant are shown. Scale bars, 20  $\mu\text{m}$ . Inset images showed a cropped and zoomed image. Scale bars, 5  $\mu\text{m}$ . (B) Retinal cryosections from 8-week-old Ctrl and HKO mice were labeled with S-opsin. Scale bars, 20  $\mu\text{m}$ . (C) Quantification of the number of S-opsin-positive cones at both dorsal and ventral side of the retina per field (Student's *t* test,  $n=5$ ). Data are presented as the mean  $\pm$  SD. #, no significant difference.

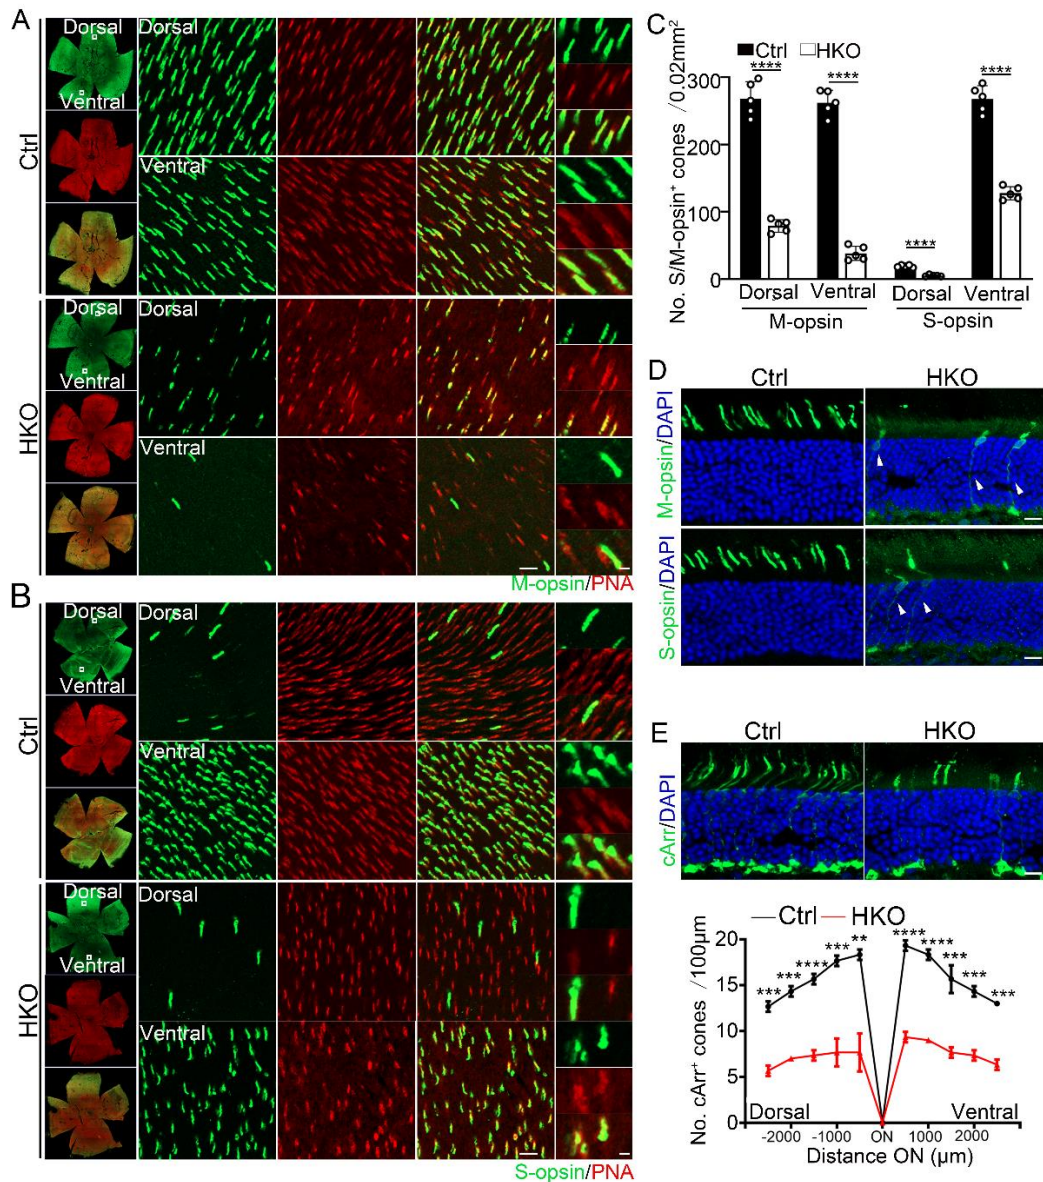

**Supplemental Figure 7. Cone cells underwent a progressive loss in HKO mice.** (A and B) Immunostaining of retina flat-mount from 16-week-old Ctrl and HKO mice with M-opsin/ S-opsin (green) and PNA (red). Scale bars, 50  $\mu\text{m}$ . Representative images from the dorsal and ventral retinal quadrant are shown. Scale bars, 20  $\mu\text{m}$ . Inset images showed a cropped and zoomed image. Scale bars, 5  $\mu\text{m}$ . (C) Quantification of the number of M-opsin- and S-opsin-positive cones at both dorsal and ventral side of the retina per field (Student's *t* test,  $n=5$ ). (D) Retinal cryosections from 16-week-old Ctrl and HKO mice were labeled with S-opsin and M-opsin. White arrowheads

arrowhead indicate the mislocalized M/S-opsin-positive cones. scale bars, 20  $\mu\text{m}$ . (E) Representative immunofluorescence images of cArr (green) of retina sections from 16-week-old Ctrl and HKO mice and the number of cArr-positive cones per 500  $\mu\text{m}$  field was quantified. Scale bars, 25  $\mu\text{m}$ . Data are presented as the mean  $\pm$  SD. Analyzed by multiple 2-tailed *t* tests with the Holm-Sidak method to correct for multiple comparisons. \*\**p* < 0.01; \*\*\**p* < 0.001; \*\*\*\**p* < 0.0001.

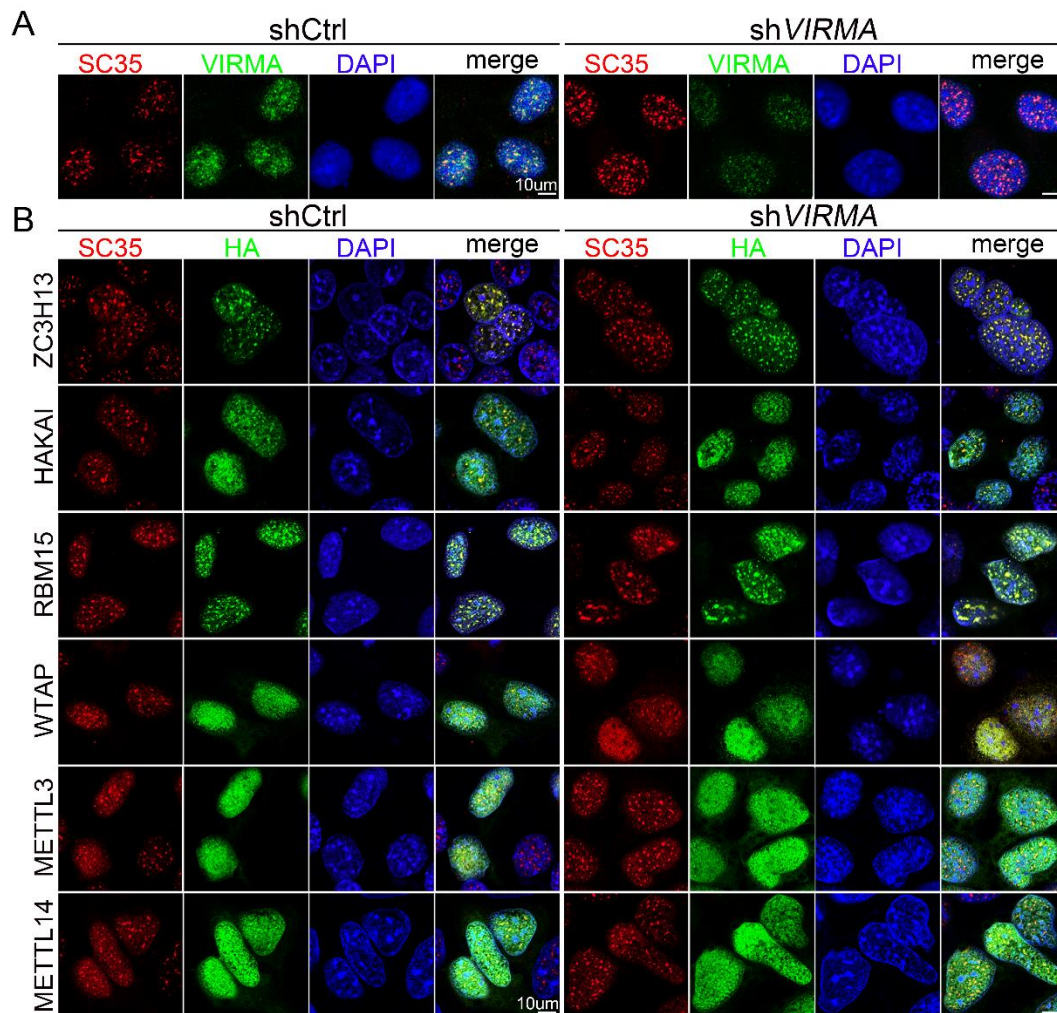

**Supplemental Figure 8. Subcellular localization of writers in loss of VIRMA. (A)**

Immunofluorescence staining of VIRMA (green), SC35 (red) and DAPI (blue, cell

nuclei) in *VIRMA* knockdown and control 293STF cells. Scale bar, 10  $\mu$ m. (B) Immunofluorescence analysis of ZC3H13 (green), HAKAI (green), RBM15 (green), WTAP (green), METTL3 (green), METTL14 (green), SC35 (red), and DAPI (blue, cell nuclei) in *VIRMA* knockdown and control 293STF cells. Scale bar, 10  $\mu$ m.

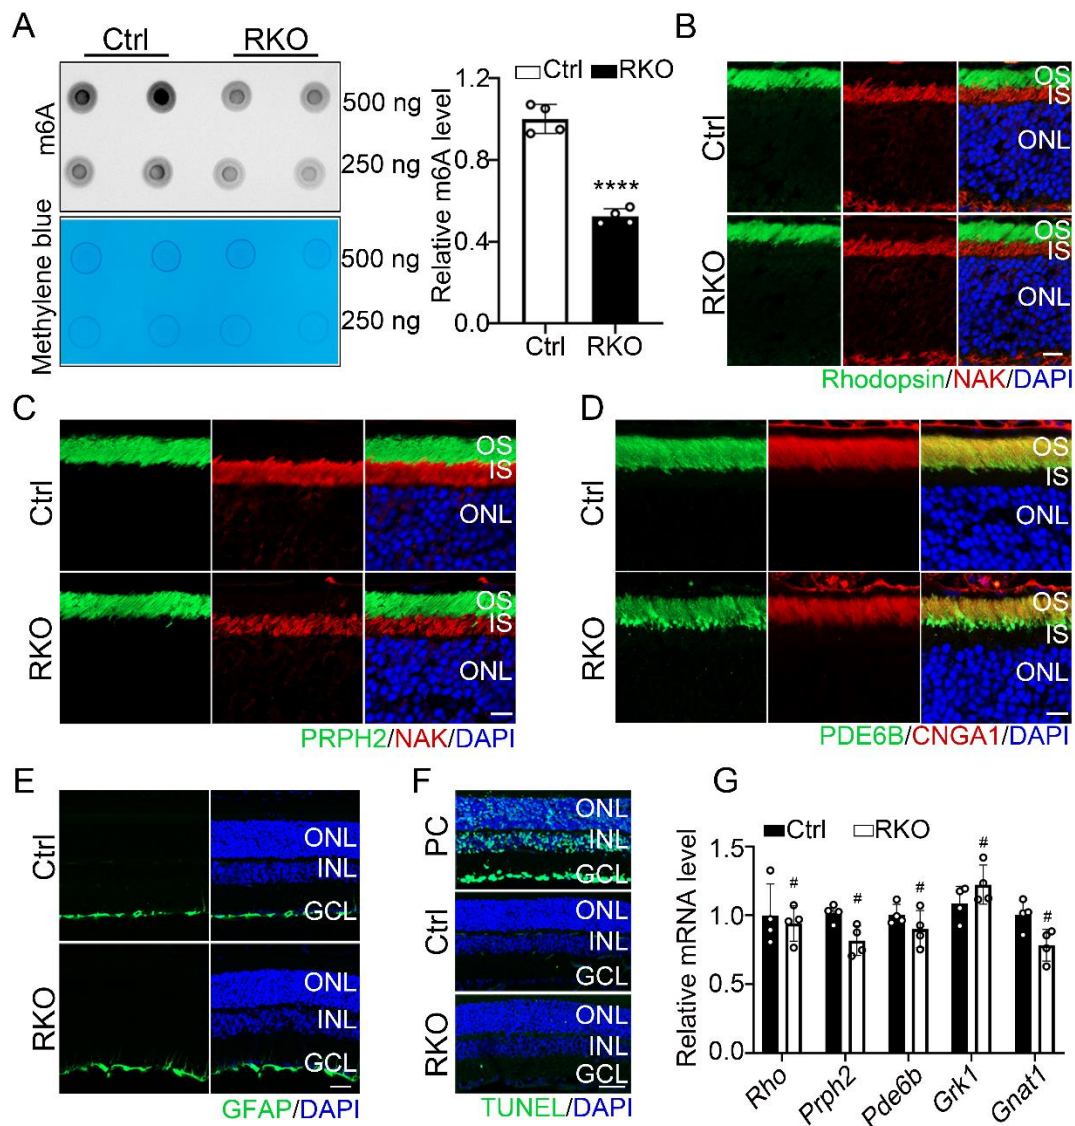

**Supplemental Figure 9. 3-week-old RKO mice showed normal retinal structure.**

(A) m<sup>6</sup>A dot blot assay of global m<sup>6</sup>A abundance in retinas from 3-week-old Ctrl and RKO mice. Methylene blue staining was used as a loading control (Student's *t* test, n=4).

(B-D) Retinal cryosections from 3-week-old mice were stained with OS marker Rhodopsin, PRPH2, PDE6B, CNGA1, and IS marker NaK ATPase. Scale bars, 25  $\mu$ m. (E) Retina cryosections from 3-week-old mice were stained with GFAP (green). Scale bars, 20  $\mu$ m. (F) Immunofluorescence labelling of retina cryosections from 3-week-old mice with the TUNEL assay kit. DNase I-treated sections served as the positive control (PC). Scale bars, 20  $\mu$ m. (G) RT-qPCR verified the mRNA expression of visual perception gene from Ctrl and RKO mice. (Student's *t* test, n=4). OS, outer segment; IS, inner segment; ONL, outer nuclear layer; INL, inner nuclear layer; GCL, ganglion cell layer. Data are presented as the mean  $\pm$  SD. \*\*\*\**p* < 0.0001; #, no significant difference.

**Supplementary Table 2. List of the PCR sets primers used genotyping in this study.**

| Name                      | Sequence                  |
|---------------------------|---------------------------|
| <i>Virma-loxp-F</i>       | ATCTCTCTGTATGCCACATAGATGC |
| <i>Virma-loxp-R</i>       | GATGATGGAACTGGAGAGAAGTC   |
| <i>Srsf3-loxp-F</i>       | TGAAGCTGTAGGATAGGCCATTTG  |
| <i>srsf3-loxp-R</i>       | TTGTCCTCTCTTCATTTGTCCAGA  |
| <i>RHO-Cre-F</i>          | TCAGTGCCTGGAGTTGCGCTGTGG  |
| <i>RHO-Cre-R</i>          | CTTAAAGGCCAGGGCCTGCTTGGC  |
| <i>HRGP-Cre-F</i>         | GAACGCACTGATTTGACCA       |
| <i>HRGP-Cre-R</i>         | GCTAACCAGCGTTTTTCGTTT     |
| <i>CAG-Virma-P1</i>       | TCAGATTCTTTTATAGGGGACACA  |
| <i>CAG-Virma-P2</i>       | TAAAGGCCACTCAATGCTCACTAA  |
| <i>CAG-Virma-P3</i>       | ATGGCGGTGGACTCGTCTATG     |
| <i>CAG-Virma-P4</i>       | AGGAGAAATGGGCTCAAAGTAATC  |
| <i>ROSA26-tdTomato-F</i>  | CACTTGCTCTCCCAAAGTCG      |
| <i>ROSA26-tdTomato-R</i>  | TAGTCTAACTCGCGACACTG      |
| <i>ROSA26-tdTomato-KI</i> | GTTATGTAACGCGGAAGTCC      |

**Supplementary Table 3. List of the antibodies used in this study.**

| Name                                      | Company                   | Catalog    | Usage                 |
|-------------------------------------------|---------------------------|------------|-----------------------|
| Anti-Rhodopsin (Rabbit polyclonal)        | Cell Signaling Technology | D4B9B      | IHC(1:200)            |
| Anti-PRPH2 (Rabbit polyclonal)            | Proteintech               | 18109-1-AP | IHC(1:200);WB(1:2000) |
| Anti-GRK1 (Rabbit polyclonal)             | Proteintech               | 24606-1-ap | IHC(1:200);WB(1:2000) |
| Anti-PDE6B (Rabbit polyclonal)            | Proteintech               | 22063-1-AP | IHC(1:200)            |
| Anti-CNGA1 (Mouse polyclonal)             | Abcam                     | ab253296   | IHC(1:200)            |
| 594-conjugated PNA                        | Vector Laboratories       | RL1072     | IHC(1:200)            |
| Anti-M-Opsin (Rabbit polyclonal)          | Millipore                 | AB5405     | IHC(1:200);WB(1:2000) |
| Anti-S-Opsin (Rabbit polyclonal)          | Millipore                 | AB5407     | IHC(1:200);WB(1:2000) |
| Anti-Cone Arrestin (Rabbit polyclonal)    | Sigma Aldrich             | AB15282    | IHC(1:200)            |
| Anti-GFAP (Rabbit polyclonal)             | Cell Signaling Technology | e417m      | IHC(1:200);WB(1:2000) |
| Anti-m <sup>6</sup> A (Rabbit polyclonal) | Cell Signaling Technology | D9D9W      | IHC(1:200)            |
| Anti-SC35 (Mouse polyclonal)              | Abcam                     | ab11826    | IHC(1:200)            |
| Anti-KIAA1429 (Rabbit polyclonal)         | Abcam                     | ab71136    | IHC(1:200);WB(1:2000) |
| Anti-HA (Rabbit polyclonal)               | Abmart                    | M20003     | IHC(1:200)            |
| Anti-HSP60 (Rabbit polyclonal)            | Proteintech               | 15282-1-AP | IHC(1:200)            |
| Anti-SRSF3 (Rabbit polyclonal)            | Abcam                     | ab198291   | IHC(1:200);WB(1:2000) |
| Anti-AC-Tublin (Mouse polyclonal)         | Sigma Aldrich             | T7451-25UL | IHC(1:200)            |
| Anti-CEP164 (Rabbit polyclonal)           | Proteintech               | 22227-1-AP | IHC(1:200)            |
| Anti-IBA1 (Rabbit polyclonal)             | Wako                      | 019-19741  | IHC(1:200);WB(1:2000) |
| Anti-METTTL3 (Rabbit polyclonal)          | Abcam                     | ab195352   | WB(1:2000)            |
| Anti-METTTL14 (Rabbit polyclonal)         | Sigma                     | SAB5700855 | WB(1:2000)            |

|                                     |                           |            |             |
|-------------------------------------|---------------------------|------------|-------------|
| Anti-WTAP (Rabbit polyclonal)       | Proteintech               | 10200-1-AP | WB(1:2000)  |
| Anti-RBM15 (Rabbit polyclonal)      | Proteintech               | 10587-1-AP | WB(1:2000)  |
| Anti-CBLL1 (Rabbit polyclonal)      | Proteintech               | 21179-1-AP | WB(1:2000)  |
| Anti-β-Actin (Rabbit polyclonal)    | Proteintech               | 20536-1-AP | WB(1:2000)  |
| Anti-Rhodopsin (Rabbit polyclonal)  | Cell Signaling Technology | D1N7X      | WB(1:2000)  |
| Anti-GNAT1 (Rabbit polyclonal)      | Proteintech               | 55167-1-AP | WB(1:2000)  |
| Anti-RDH12 (Rabbit polyclonal)      | Proteintech               | 13289-3-AP | WB(1:2000)  |
| Anti-POLG2 (Rabbit polyclonal)      | Abclonal                  | A6695      | WB(1:2000)  |
| Anti-RGS9 (Rabbit polyclonal)       | Proteintech               | 17970-1-AP | WB(1:2000)  |
| Anti-PDE6G (Rabbit polyclonal)      | Proteintech               | 18151-1-AP | WB(1:2000)  |
| Anti-CRE (Rabbit polyclonal)        | Cell Signaling Technology | 15036T     | IHC(1:200)  |
| HRP-conjugated Goat Anti-Mouse IgG  | Proteintech               | SA00001-1  | WB(1:5000)  |
| HRP-conjugated Goat Anti-Rabbit IgG | Proteintech               | SA00001-2  | WB(1:5000)  |
| Goat Anti-Mouse IgG 488             | Thermo Fisher Scientific  | A11029     | IHC(1:500)  |
| Goat Anti-Mouse IgG 594             | Thermo Fisher Scientific  | A-11005    | IHC(1:500)  |
| Goat Anti-Rabbit IgG 488            | Thermo Fisher Scientific  | A-11008    | IHC(1:500)  |
| Goat Anti-Rabbit IgG 594            | Thermo Fisher Scientific  | A-11012    | IHC(1:500)  |
| DAPI                                | Biologend                 | 422801     | IHC(1:1000) |

**Supplementary Table 4. List of the RT-qPCR primers used in this study.**

| Gene name    | Forward (5'-3')      | Reverse (5'-3')       |
|--------------|----------------------|-----------------------|
| <i>Bcl2a</i> | TTTGAGTTCGGTGGGGTCAT | CTGGGGCCATATAGTTCACAA |
| <i>Sod1</i>  | GGAACCATCCACTTCGAGCA | CCCATGCTGGCCTTCAGTTA  |
| <i>Sod2</i>  | GCCTGCTCTAATCAGGACCC | GGTAGTAAGCGTGCTCCCAC  |

|                                 |                       |                        |
|---------------------------------|-----------------------|------------------------|
| <i>Virma</i>                    | ATGTCATGGAAACTGCACCTC | GAGTGCTGAAAACCAAACCCA  |
| <i>Gnat1</i>                    | GACTCCAGGATATGTGCCCA  | CACCAGCACCATGTCGTAAG   |
| <i>Guc1b</i>                    | AAGCGCTTCTTCAAGGTCAC  | GCTTGTAATCGCCTCCACA    |
| <i>Pde6g</i>                    | AAGGCAGTTCAAGAGCAAGC  | GAGGGGTCTTCGCGGTT      |
| <i>Rho</i>                      | CACCACCACCCTCTACACAT  | GATAGCGTGATTCTCCCCGA   |
| <i>Slc24a1</i>                  | AGATGGTGGAGGGGAAAGTG  | GGAGGAAGAGGTAGATGGCC   |
| <i>Mdm1</i>                     | CCCAGAGCATAGATCCCAGG  | TTGGATGCAAACACTGGAGC   |
| <i>Prph2</i>                    | CCTGGCTTACGGACTCAAGA  | ATCCACGTTGCTCTTGATGC   |
| <i>Rdh12</i>                    | GTTGGAGAGGCTGAAGGAGT  | CTCTGACAATACAACGCCCG   |
| <i>Rgs9</i>                     | AGATGCGAGTGGAGAGATGG  | TTGGACTGATCGCCGTACTION |
| <i>Rsl</i>                      | CAGAGGATGAGGGTGAGGAC  | GCCTTGTTTGCTGTCCATGA   |
| <i>Rgs9bp</i>                   | AATGAAAGTCAACGTGCCCC  | GCTCAGCTTTGCCACACATA   |
| <i>Cc2d2a</i>                   | ATTCAACTGGCCAGAGAGCT  | CCCACCTCCAACCTCCCTCAT  |
| <i>Pde6b</i>                    | CCCCTGACTCTGAGATCGTC  | TGATCACAGCCACGACATCT   |
| <i><math>\beta</math>-actin</i> | GGCTGTATTCCCCTCCATCG  | CCAGTTGGTAACAATGCCATGT |
